# Supplementary material for: Masitinib treatment in patients with progressive multiple sclerosis: a randomized pilot study
Source: PubMed Central journal article supplement (PMC3467179; doi:10.1186/1471-2377-12-36), 2012-06-12
Supplement: 1471-2377-12-36-S2.pdf [file 1471-2377-12-36-S2.pdf]

## **Additional Files**

### **Additional file 2: Details of masitinib response data**

Details of masitinib response data - mean change from baseline at months 3, 6, 9, 12, and 18 (mITT population, LOCF method).

Supplemental information for the article:

**Masitinib treatment in patients with progressive multiple sclerosis: Results of an exploratory phase 2a clinical study.** Patrick Vermersch, Rabah Benrabah, Nicolas Schmidt, Pierre Clavelou, H el ene Z e phir, Cyrille Vongsouthi, Patrice Dubreuil, Alain Moussy and Olivier Hermine.

**Additional file 2: Details of masitinib response data - mean change from baseline at months 3, 6, 9, 12, and 18 (mITT population, LOCF method).**

|                                                         |               |                    | Month 3    | Month 6    | Month 9    | Month 12   | Month 18   |
|---------------------------------------------------------|---------------|--------------------|------------|------------|------------|------------|------------|
| <b>MSFC score</b><br>Relative change (%)<br>(Mean ± SD) | All (n = 30)  | Masitinib (n = 24) | 78 ± 284   | 156 ± 274  | 70 ± 267   | 103 ± 189  | 96 ± 191   |
|                                                         |               | Placebo (n = 6)    | -64 ± 188  | -58 ± 200  | -49 ± 193  | -60 ± 190  | -61 ± 190  |
|                                                         | PPMS (n = 12) | Masitinib (n = 9)  | 108 ± 435  | 202 ± 353  | 56 ± 410   | 134 ± 268  | 134 ± 268  |
|                                                         |               | Placebo (n = 3)    | -14 ± 40   | -20 ± 92   | 8 ± 21     | -11 ± 47   | -11 ± 47   |
|                                                         | SPMS (n = 18) | Masitinib (n = 15) | 60 ± 152   | 129 ± 223  | 78 ± 146   | 84 ± 130   | 73 ± 131   |
|                                                         |               | Placebo (n = 3)    | -113 ± 281 | -96 ± 296  | -106 ± 287 | -109 ± 284 | -110 ± 284 |
| <b>T25FW</b><br>Relative change (%)<br>(Mean ± SD)      | All           | Masitinib          | -2 ± 12    | -1 ± 24    | 9 ± 31     | 5 ± 26     | 6 ± 26     |
|                                                         |               | Placebo            | 19 ± 58    | 17 ± 60    | 29 ± 53    | 26 ± 55    | 37 ± 52    |
|                                                         | PPMS          | Masitinib          | 1 ± 9      | 12 ± 16    | 21 ± 34    | 13 ± 17    | 13 ± 17    |
|                                                         |               | Placebo            | 1 ± 7      | -1 ± 16    | 8 ± 3      | 13 ± 3     | 13 ± 3     |
|                                                         | SPMS          | Masitinib          | -4 ± 13    | -9 ± 26    | 2 ± 28     | -1 ± 29    | 2 ± 30     |
|                                                         |               | Placebo            | 37 ± 87    | 34 ± 89    | 49 ± 76    | 39 ± 85    | 61 ± 70    |
| <b>9-HPT</b><br>Relative change (%)<br>(Mean ± SD)      | All           | Masitinib          | -4 ± 9     | -6 ± 11    | -6 ± 12    | -7 ± 9     | -5 ± 10    |
|                                                         |               | Placebo            | 2 ± 13     | 0 ± 19     | -1 ± 16    | 0 ± 13     | 3 ± 13     |
|                                                         | PPMS          | Masitinib          | -6 ± 10    | -7 ± 8     | -4 ± 12    | -5 ± 7     | -6 ± 7     |
|                                                         |               | Placebo            | 6 ± 11     | 5 ± 19     | 2 ± 11     | 2 ± 9      | 2 ± 9      |
|                                                         | SPMS          | Masitinib          | -4 ± 8     | -6 ± 13    | -8 ± 12    | -8 ± 10    | -4 ± 12    |
|                                                         |               | Placebo            | -1 ± 17    | -5 ± 21    | -5 ± 22    | -2 ± 18    | 3 ± 19     |
| <b>PASAT-3"</b><br>Relative change (%)<br>(Mean ± SD)   | All           | Masitinib          | 31 ± 107   | 43 ± 104   | 38 ± 106   | 41 ± 111   | 44 ± 111   |
|                                                         |               | Placebo            | 18 ± 26    | 28 ± 43    | 25 ± 29    | 24 ± 30    | 36 ± 61    |
|                                                         | PPMS          | Masitinib          | 20 ± 69    | 14 ± 58    | 15 ± 65    | 19 ± 66    | 16 ± 65    |
|                                                         |               | Placebo            | 1 ± 10     | 5 ± 15     | 9 ± 3      | 7 ± 4      | 7 ± 4      |
|                                                         | SPMS          | Masitinib          | 37 ± 127   | 60 ± 123   | 51 ± 125   | 55 ± 131   | 60 ± 131   |
|                                                         |               | Placebo            | 36 ± 26    | 51 ± 53    | 41 ± 36    | 41 ± 36    | 65 ± 81    |
| <b>EDSS</b><br>Absolute change<br>(Mean ± SD)           | All           | Masitinib          | -0.1 ± 0.3 | -0.1 ± 0.4 | 0 ± 0.4    | 0 ± 0.5    | 0 ± 0.5    |
|                                                         |               | Placebo            | 0.1 ± 0.4  | 0 ± 0.8    | 0.1 ± 0.8  | 0.3 ± 1.0  | 0.3 ± 1.0  |
|                                                         | PPMS          | Masitinib          | -0.1 ± 0.2 | -0.2 ± 0.5 | -0.1 ± 0.4 | 0.1 ± 0.4  | 0.1 ± 0.4  |
|                                                         |               | Placebo            | 0 ± 0.4    | -0.3 ± 0.8 | -0.2 ± 0.8 | -0.2 ± 0.8 | -0.2 ± 0.8 |
|                                                         | SPMS          | Masitinib          | 0 ± 0.3    | 0 ± 0.3    | 0 ± 0.3    | 0 ± 0.5    | 0 ± 0.5    |
|                                                         |               | Placebo            | 0.3 ± 0.6  | 0.5 ± 0.5  | 0.7 ± 0.6  | 1.0 ± 1.0  | 1.0 ± 1.0  |

In the primary endpoint of MSFC an increased score relative to baseline represents an improvement in MS-related impairment. Increased scores represent deterioration in the 9-HPT, T25FW and EDSS. Decreased scores represent deterioration in the PASAT-3 and EDSS. mITT = modified intent to treat population. LOCF = last observation carried forward. MSFC = multiple sclerosis functional composite score. T25FW = timed 25-foot walk test. 9-HPT = nine hole peg test. PASAT-3" = Paced Auditory Serial Addition. Test 3 seconds. EDSS = expanded disability status scale.
